# Supplementary material
Source: Elsevier journal article supplement (https://comptes-rendus.academie-sciences.fr/chimie/article/10.1016/j.crci.2013.01.016/file/attach/mmc1.pdf)
Supplement: mmc1 [file mmc1.pdf]

## checkCIF/PLATON (standard)

You have not supplied any structure factors. As a result the full set of tests cannot be run.

No syntax errors found.  
Please wait while processing ....

[CIF dictionary](#)  
[Interpreting this report](#)

## Datablock: LDiPPH2OTf2

|                 |                                               |                    |
|-----------------|-----------------------------------------------|--------------------|
| Bond precision: | C-C = 0.0091 Å                                | Wavelength=0.71073 |
| Cell:           | a=15.6001(11)    b=24.6198(11)    c=9.9798(4) |                    |
|                 | alpha=90    beta=103.562(4)    gamma=90       |                    |
| Temperature:    | 120 K                                         |                    |

  

|                        | Calculated               | Reported                        |
|------------------------|--------------------------|---------------------------------|
| Volume                 | 3726.1(4)                | 3726.1(4)                       |
| Space group            | C 2/c                    | C2/c                            |
| Hall group             | -C 2yc                   | -C 2yc                          |
| Moiety formula         | C31 H42 N4, 2(C F3 O3 S) | C31 H42 N4, 2(C F3 O3 S)        |
| Sum formula            | C33 H42 F6 N4 O6 S2      | C33 H42 F6 N4 O6 S2             |
| Mr                     | 768.85                   | 768.83                          |
| Dx, g cm <sup>-3</sup> | 1.371                    | 1.371                           |
| Z                      | 4                        | 4                               |
| Mu (mm <sup>-1</sup> ) | 0.220                    | 0.220                           |
| F000                   | 1608.0                   | 1608.0                          |
| F000'                  | 1609.96                  |                                 |
| h, k, lmax             | 18, 29, 11               | 18, 29, 11                      |
| Nref                   | 3301                     | 3291                            |
| Tmin, Tmax             | 0.979, 0.983             | 0.961, 0.981                    |
| Tmin'                  | 0.961                    |                                 |
| Correction method=     | MULTI-SCAN               |                                 |
| Data completeness=     | 0.997                    | Theta(max)= 25.030              |
| R(reflections)=        | 0.1011( 2654)            | wR2(reflections)= 0.2101( 3291) |
| S =                    | 1.216                    | Npar= 241                       |

The following ALERTS were generated. Each ALERT has the format

**test-name\_ALERT\_alert-type\_alert-level.**

Click on the hyperlinks for more details of the test.

### ● Alert level C

[RFACG01\\_ALERT\\_3\\_C](#) The value of the R factor is > 0.10  
R factor given 0.101

|                                                                                 |            |
|---------------------------------------------------------------------------------|------------|
| <a href="#">PLAT244_ALERT_4_C</a> Low 'Solvent' Ueq as Compared to Neighbors of | S1         |
| <a href="#">PLAT244_ALERT_4_C</a> Low 'Solvent' Ueq as Compared to Neighbors of | C17        |
| <a href="#">PLAT340_ALERT_3_C</a> Low Bond Precision on C-C Bonds .....         | 0.0091 Ang |
| <a href="#">PLAT366_ALERT_2_C</a> Short? C(sp?)-C(sp?) Bond C1 - C2 ...         | 1.39 Ang.  |
| <a href="#">PLAT366_ALERT_2_C</a> Short? C(sp?)-C(sp?) Bond C2 - C3 ...         | 1.39 Ang.  |

### ● Alert level G

|                                                                                    |          |
|------------------------------------------------------------------------------------|----------|
| <a href="#">PLAT002_ALERT_2_G</a> Number of Distance or Angle Restraints on AtSite | 7        |
| <a href="#">PLAT005_ALERT_5_G</a> No _iucr_refine_instructions_details in CIF .... | ?        |
| <a href="#">PLAT083_ALERT_2_G</a> SHELXL Second Parameter in WGHT Unusually Large. | 43.73    |
| <a href="#">PLAT301_ALERT_3_G</a> Note: Main Residue Disorder .....                | 17 Perc. |
| <a href="#">PLAT720_ALERT_4_G</a> Number of Unusual/Non-Standard Labels .....      | 12       |
| <a href="#">PLAT860_ALERT_3_G</a> Note: Number of Least-Squares Restraints .....   | 6        |

0 **ALERT level A** = Most likely a serious problem - resolve or explain  
0 **ALERT level B** = A potentially serious problem, consider carefully  
6 **ALERT level C** = Check. Ensure it is not caused by an omission or oversight  
6 **ALERT level G** = General information/check it is not something unexpected

0 ALERT type 1 CIF construction/syntax error, inconsistent or missing data  
4 ALERT type 2 Indicator that the structure model may be wrong or deficient  
4 ALERT type 3 Indicator that the structure quality may be low  
3 ALERT type 4 Improvement, methodology, query or suggestion  
1 ALERT type 5 Informative message, check

## Datablock: Lmes

Bond precision: C-C = 0.0017 A Wavelength=0.69110  
 Cell: a=8.030(3) b=9.795(3) c=28.373(10)  
 alpha=90 beta=97.544(3) gamma=90  
 Temperature: 120 K

|                | Calculated | Reported    |
|----------------|------------|-------------|
| Volume         | 2212.3(13) | 2212.3(13)  |
| Space group    | P 21/c     | P21/c       |
| Hall group     | -P 2ybc    | -P 2ybc     |
| Moiety formula | C25 H28 N4 | C25 H28 N4  |
| Sum formula    | C25 H28 N4 | C25 H28 N4  |
| Mr             | 384.51     | 384.51      |
| Dx, g cm-3     | 1.155      | 1.154       |
| Z              | 4          | 4           |
| Mu (mm-1)      | 0.065      | 0.069       |
| F000           | 824.0      | 824.0       |
| F000'          | 824.89     |             |
| h,k,lmax       | 11,14,40   | 11,14,39    |
| Nref           | 6994       | 6380        |
| Tmin,Tmax      |            | 0.989,0.995 |
| Tmin'          | 0.961      |             |

Correction method= MULTI-SCAN  
 Data completeness= 0.912 Theta(max)= 29.950  
 R(reflections)= 0.0539( 5380) wR2(reflections)= 0.1601( 6380)  
 S = 1.035 Npar= 268

The following ALERTS were generated. Each ALERT has the format

**test-name\_ALERT\_alert-type\_alert-level.**

Click on the hyperlinks for more details of the test.

## Alert level A

[PLAT029\\_ALERT\\_3\\_A](#) \_diffn\_measured\_fraction\_theta\_full Low ..... 0.913

## Alert level C

REFLT03\_ALERT\_3\_C Reflection count < 95% complete  
 From the CIF: \_diffn\_refl\_theta\_max 29.95  
 From the CIF: \_diffn\_refl\_theta\_full 29.95  
 From the CIF: \_reflns\_number\_total 6380  
 TEST2: Reflns within \_diffn\_refl\_theta\_max  
 Count of symmetry unique reflns 6994  
 Completeness (\_total/calc) 91.22%

## Alert level G

[PLAT005\\_ALERT\\_5\\_G](#) No \_iucr\_refine\_instructions\_details in CIF .... ?  
[PLAT343\\_ALERT\\_2\\_G](#) Check sp? Angle Range in Main Residue for .. C10  
[PLAT343\\_ALERT\\_2\\_G](#) Check sp? Angle Range in Main Residue for .. C14  
[PLAT984\\_ALERT\\_1\\_G](#) The H-f'= 0.000 Deviates from the B&C-Value 0.006

- 1 **ALERT level A** = Most likely a serious problem - resolve or explain  
 0 **ALERT level B** = A potentially serious problem, consider carefully  
 1 **ALERT level C** = Check. Ensure it is not caused by an omission or oversight  
 4 **ALERT level G** = General information/check it is not something unexpected

- 1 ALERT type 1 CIF construction/syntax error, inconsistent or missing data  
 2 ALERT type 2 Indicator that the structure model may be wrong or deficient  
 2 ALERT type 3 Indicator that the structure quality may be low  
 0 ALERT type 4 Improvement, methodology, query or suggestion  
 1 ALERT type 5 Informative message, check

## Datablock: LDiPPTe2

Bond precision: C-C = 0.0082 A Wavelength=0.71073  
 Cell: a=12.1082(10) b=16.4200(13) c=18.3694(15)  
 alpha=90 beta=99.721(2) gamma=90  
 Temperature: 120 K

|                | Calculated            | Reported              |
|----------------|-----------------------|-----------------------|
| Volume         | 3599.7(5)             | 3599.7(5)             |
| Space group    | P 21/c                | P21/c                 |
| Hall group     | -P 2ybc               | -P 2ybc               |
| Moiety formula | C31 H40 N4 Te2, C6 H6 | C31 H40 N4 Te2, C6 D6 |

|                               |                                                                                            |                                                                                                           |
|-------------------------------|--------------------------------------------------------------------------------------------|-----------------------------------------------------------------------------------------------------------|
| Sum formula                   | C <del>37</del> <sup>38</sup> H <del>46</del> <sup>40</sup> N <sub>4</sub> Te <sub>2</sub> | C <del>37</del> <sup>38</sup> H <del>46</del> <sup>40</sup> D <sub>6</sub> N <sub>4</sub> Te <sub>2</sub> |
| Dx, g cm <sup>-3</sup>        | 1.480                                                                                      | 1.491                                                                                                     |
| Z                             | 4                                                                                          | 4                                                                                                         |
| Mu (mm <sup>-1</sup> )        | 1.650                                                                                      | 1.650                                                                                                     |
| F000                          | 1600.0                                                                                     | 1600.0                                                                                                    |
| F000'                         | 1596.18                                                                                    |                                                                                                           |
| h, k, lmax                    | 16, 21, 24                                                                                 | 15, 21, 23                                                                                                |
| Nref                          | 8698                                                                                       | 8380                                                                                                      |
| Tmin, Tmax                    | 0.794, 0.984                                                                               | 0.802, 0.984                                                                                              |
| Tmin'                         | 0.794                                                                                      |                                                                                                           |
| Correction method= MULTI-SCAN |                                                                                            |                                                                                                           |
| Data completeness=            | 0.963                                                                                      | Theta(max)= 28.020                                                                                        |
| R(reflections)=               | 0.0508( 6807)                                                                              | wR2(reflections)= 0.1143( 8380)                                                                           |
| S =                           | 1.104                                                                                      | Npar= 396                                                                                                 |

The following ALERTS were generated. Each ALERT has the format

**test-name\_ALERT\_alert-type\_alert-level.**

Click on the hyperlinks for more details of the test.

### Alert level C

PLAT029\_ALERT\_3\_C\_diffnrm\_measured\_fraction\_theta\_full Low ..... 0.963  
 PLAT041\_ALERT\_1\_C Calc. and Reported SumFormula Strings Differ ?  
 PLAT250\_ALERT\_2\_C Large U3/U1 Ratio for Average U(i,j) Tensor .... 3.8  
 PLAT342\_ALERT\_3\_C Low Bond Precision on C-C Bonds ..... 0.0082 Ang

### Alert level G

FORMU01\_ALERT\_2\_G There is a discrepancy between the atom counts in the  
 \_chemical\_formula\_sum and the formula from the \_atom\_site\* data.

Atom count from \_chemical\_formula\_sum: C37 H40 D6 N4 Te2

Atom count from the \_atom\_site data: C37 H46 N4 Te2

CELLZ01\_ALERT\_1\_G Difference between formula and atom\_site contents detected.

CELLZ01\_ALERT\_1\_G ALERT: Large difference may be due to a

symmetry error - see SYMMG tests

From the CIF: \_cell\_formula\_units\_Z 4

From the CIF: \_chemical\_formula\_sum C37 H40 D6 N4 Te2

TEST: Compare cell contents of formula and atom\_site data

| atom | Z*formula | cif sites | diff   |
|------|-----------|-----------|--------|
| C    | 148.00    | 148.00    | 0.00   |
| H    | 160.00    | 184.00    | -24.00 |
| D    | 24.00     | 0.00      | 24.00  |
| N    | 16.00     | 16.00     | 0.00   |
| Te   | 8.00      | 8.00      | 0.00   |

PLAT005\_ALERT\_5\_G No \_iucr\_refine\_instructions\_details in CIF .... ?

PLAT017\_ALERT\_1\_G Check Consistency of Scattering Type H for D32

PLAT017\_ALERT\_1\_G Check Consistency of Scattering Type H for D33

PLAT017\_ALERT\_1\_G Check Consistency of Scattering Type H for D34

PLAT017\_ALERT\_1\_G Check Consistency of Scattering Type H for D35

PLAT017\_ALERT\_1\_G Check Consistency of Scattering Type H for D36

PLAT017\_ALERT\_1\_G Check Consistency of Scattering Type H for D37

PLAT042\_ALERT\_1\_G Calc. and Reported MoietyFormula Strings Differ ?

PLAT083\_ALERT\_2\_G SHELXL Second Parameter in WGHT Unusually Large. 20.24

PLAT720\_ALERT\_4\_G Number of Unusual/Non-Standard Labels ..... 6

0 **ALERT level A** = Most likely a serious problem - resolve or explain

0 **ALERT level B** = A potentially serious problem, consider carefully

4 **ALERT level C** = Check. Ensure it is not caused by an omission or oversight

13 **ALERT level G** = General information/check it is not something unexpected

10 ALERT type 1 CIF construction/syntax error, inconsistent or missing data

3 ALERT type 2 Indicator that the structure model may be wrong or deficient

2 ALERT type 3 Indicator that the structure quality may be low

1 ALERT type 4 Improvement, methodology, query or suggestion

1 ALERT type 5 Informative message, check

## Datablock: complex1

|                    |                               |                    |
|--------------------|-------------------------------|--------------------|
| Bond precision:    | C-C = 0.0035 A                | Wavelength=0.68930 |
| Cell:              | a=9.2015(18)      b=18.932(4) | c=19.892(4)        |
|                    | alpha=90            beta=90   | gamma=90           |
| Temperature: 120 K |                               |                    |
|                    | Calculated                    | Reported           |
| Volume             | 3465.2(12)                    | 3465.2(12)         |

|                    |                        |                                  |
|--------------------|------------------------|----------------------------------|
| Space group        | P 21 21 21             | P212121                          |
| Hall group         | P 2ac 2ab              | ?                                |
| Moiety formula     | C33 H46 N4 Pd, C4 H8 O | ?                                |
| Sum formula        | C37 H54 N4 O Pd        | C148 H216 N16 O4 Pd4             |
| Mr                 | 677.24                 | 2708.97                          |
| Dx,g cm-3          | 1.298                  | 0.000                            |
| Z                  | 4                      | 1                                |
| Mu (mm-1)          | 0.518                  | 0.000                            |
| F000               | 1432.0                 | 0.0                              |
| F000'              | 1428.13                |                                  |
| h,k,lmax           | 13,27,29               | 13,26,28                         |
| Nref               | 6406[ 11601]           | 10304                            |
| Tmin,Tmax          |                        |                                  |
| Tmin'              | 0.794                  |                                  |
| Correction method= | Not given              |                                  |
| Data completeness= | 1.61/0.89              | Theta(max)= 30.510               |
| R(reflections)=    | 0.0309( 9778)          | wR2(reflections)= 0.0711( 10304) |
| S =                | 1.019                  | Npar= 411                        |

The following ALERTS were generated. Each ALERT has the format

**test-name\_ALERT\_alert-type\_alert-level.**

Click on the hyperlinks for more details of the test.

## Alert level C

PLAT234\_ALERT\_4\_C Large Hirshfeld Difference C35B -- C36B .. 0.16 Ang.  
 PLAT250\_ALERT\_2\_C Large U3/U1 Ratio for Average U(i,j) Tensor .... 2.9

## Alert level G

REFLT03\_ALERT\_4\_G Please check that the estimate of the number of Friedel pairs is correct. If it is not, please give the correct count in the

\_publ\_section\_exptl\_refinement section of the submitted CIF.

From the CIF: \_diffrn\_refl\_theta\_max 30.51

From the CIF: \_reflns\_number\_total 10304

Count of symmetry unique reflns 6406

Completeness (\_total/calc) 160.85%

TEST3: Check Friedels for noncentro structure

Estimate of Friedel pairs measured 3898

Fraction of Friedel pairs measured 0.608

Are heavy atom types Z>Si present yes

PLAT002\_ALERT\_2\_G Number of Distance or Angle Restraints on AtSite 9  
 PLAT005\_ALERT\_5\_G No \_iucr\_refine\_instructions\_details in CIF .... ?  
 PLAT045\_ALERT\_1\_G Calculated and Reported Z Differ by ..... 4.00 Ratio  
 PLAT244\_ALERT\_4\_G Low 'Solvent' Ueq as Compared to Neighbors of C34B  
 PLAT244\_ALERT\_4\_G Low 'Solvent' Ueq as Compared to Neighbors of C36B  
 PLAT244\_ALERT\_4\_G Low 'Solvent' Ueq as Compared to Neighbors of C34A  
 PLAT244\_ALERT\_4\_G Low 'Solvent' Ueq as Compared to Neighbors of C36A  
 PLAT302\_ALERT\_4\_G Note: Anion/Solvent Disorder ..... 80 Perc.  
 PLAT710\_ALERT\_4\_G Delete 1-2-3 or 2-3-4 Linear Torsion Angle ... # 101  
 N2 -C3 -PD1 -C32 94.20 1.50 1.555 1.555 1.555 1.555  
 PLAT710\_ALERT\_4\_G Delete 1-2-3 or 2-3-4 Linear Torsion Angle ... # 102  
 N3 -C3 -PD1 -C32 -85.70 1.50 1.555 1.555 1.555 1.555  
 PLAT710\_ALERT\_4\_G Delete 1-2-3 or 2-3-4 Linear Torsion Angle ... # 111  
 N4 -C1 -PD1 -C33 -29.00 3.00 1.555 1.555 1.555 1.555  
 PLAT710\_ALERT\_4\_G Delete 1-2-3 or 2-3-4 Linear Torsion Angle ... # 112  
 N1 -C1 -PD1 -C33 143.00 3.00 1.555 1.555 1.555 1.555  
 PLAT779\_ALERT\_4\_G Suspect or Irrelevant (Bond) Angle in CIF .... # 205  
 C34A -O1 -C34B 1.555 1.555 1.555 10.00 Deg.  
 PLAT779\_ALERT\_4\_G Suspect or Irrelevant (Bond) Angle in CIF .... # 210  
 C37A -O1 -C37B 1.555 1.555 1.555 13.20 Deg.  
 PLAT860\_ALERT\_3\_G Note: Number of Least-Squares Restraints ..... 10  
 PLAT984\_ALERT\_1\_G The Pd-f' = -0.999 Deviates from the B&C-Value -1.052  
 PLAT985\_ALERT\_1\_G The Pd-f'' = 1.007 Deviates from the B&C-Value 0.957

0 **ALERT level A** = Most likely a serious problem - resolve or explain  
 0 **ALERT level B** = A potentially serious problem, consider carefully  
 2 **ALERT level C** = Check. Ensure it is not caused by an omission or oversight  
 18 **ALERT level G** = General information/check it is not something unexpected

3 ALERT type 1 CIF construction/syntax error, inconsistent or missing data  
 2 ALERT type 2 Indicator that the structure model may be wrong or deficient  
 1 ALERT type 3 Indicator that the structure quality may be low  
 13 ALERT type 4 Improvement, methodology, query or suggestion  
 1 ALERT type 5 Informative message, check

## Datablock: complex2

---

Bond precision: C-C = 0.0073 A Wavelength=0.71073

Cell: a=9.1685(1) b=18.9619(2) c=19.9278(2)  
 alpha=90 beta=90 gamma=90

Temperature: 120 K

|                        | Calculated             | Reported                 |
|------------------------|------------------------|--------------------------|
| Volume                 | 3464.49(6)             | 3464.49(6)               |
| Space group            | P 21 21 21             | P212121                  |
| Hall group             | P 2ac 2ab              | ?                        |
| Moiety formula         | C33 H46 N4 Pt, C4 H8 O | C33 H46 N4 Pt, (C4 H8 O) |
| Sum formula            | C37 H54 N4 O Pt        | C37 H54 N4 O Pt          |
| Mr                     | 765.92                 | 765.93                   |
| Dx, g cm <sup>-3</sup> | 1.468                  | 1.468                    |
| Z                      | 4                      | 4                        |
| Mu (mm <sup>-1</sup> ) | 4.084                  | 4.084                    |
| F000                   | 1560.0                 | 1560.0                   |
| F000'                  | 1553.79                |                          |
| h, k, lmax             | 11, 24, 25             | 11, 24, 25               |
| Nref                   | 4442 [ 7946 ]          | 7809                     |
| Tmin, Tmax             | 0.907, 0.922           | 0.686, 0.923             |
| Tmin'                  | 0.665                  |                          |

Correction method= MULTI-SCAN

Data completeness= 1.76/0.98 Theta(max)= 27.490

R(reflections)= 0.0306( 7346) wR2(reflections)= 0.0628( 7809)

S = 1.130 Npar= 399

---

The following ALERTS were generated. Each ALERT has the format  
[test-name\\_ALERT\\_alert-type\\_alert-level](#).  
 Click on the hyperlinks for more details of the test.

---

### ●Alert level C

STRVA01\_ALERT\_2\_C Chirality of atom sites is inverted?  
 From the CIF: `_refine_ls_abs_structure_Flack` 0.915  
 From the CIF: `_refine_ls_abs_structure_Flack_su` 0.007

PLAT033\_ALERT\_4\_C Flack x Parameter Value Deviates from Zero ..... 0.915

PLAT223\_ALERT\_4\_C Large Solvent/Anion H Ueq(max)/Ueq(min) ... 3.4 Ratio

PLAT243\_ALERT\_4\_C High 'Solvent' Ueq as Compared to Neighbors of C47

PLAT244\_ALERT\_4\_C Low 'Solvent' Ueq as Compared to Neighbors of C45

PLAT244\_ALERT\_4\_C Low 'Solvent' Ueq as Compared to Neighbors of C46

PLAT360\_ALERT\_2\_C Short C(sp3)-C(sp3) Bond C45 - C47 ... 1.40 Ang.

---

### ●Alert level G

REFLT03\_ALERT\_4\_G Please check that the estimate of the number of Friedel pairs is correct. If it is not, please give the correct count in the `_publ_section_exptl_refinement` section of the submitted CIF.

From the CIF: `_diffn_refl_theta_max` 27.49  
 From the CIF: `_reflns_number_total` 7809  
 Count of symmetry unique reflns 4442  
 Completeness (`_total/calc`) 175.80%  
 TEST3: Check Friedels for noncentro structure  
 Estimate of Friedel pairs measured 3367  
 Fraction of Friedel pairs measured 0.758  
 Are heavy atom types Z>Si present yes

PLAT005\_ALERT\_5\_G No `_iucr_refine_instructions_details` in CIF .... ?

PLAT042\_ALERT\_1\_G Calc. and Reported MoietyFormula Strings Differ ?

---

0 **ALERT level A** = Most likely a serious problem - resolve or explain  
 0 **ALERT level B** = A potentially serious problem, consider carefully  
 7 **ALERT level C** = Check. Ensure it is not caused by an omission or oversight  
 3 **ALERT level G** = General information/check it is not something unexpected

1 ALERT type 1 CIF construction/syntax error, inconsistent or missing data  
 2 ALERT type 2 Indicator that the structure model may be wrong or deficient  
 0 ALERT type 3 Indicator that the structure quality may be low  
 6 ALERT type 4 Improvement, methodology, query or suggestion  
 1 ALERT type 5 Informative message, check

---

## Datablock: complex3

---

Bond precision: C-C = 0.0096 A Wavelength=0.71073

Cell: a=13.6258(4) b=24.9908(7) c=25.1385(4)  
 alpha=90 beta=90 gamma=90

Temperature: 153 K

|                        | Calculated                   | Reported                        |
|------------------------|------------------------------|---------------------------------|
| Volume                 | 8560.2(4)                    | 8560.2(4)                       |
| Space group            | P b c a                      | P b c a                         |
| Hall group             | -P 2ac 2ab                   | ?                               |
| Moiety formula         | C39 H52 Ir N4, F6 P, C4 H8 O | C39 H52 Ir N4, P F6, C4 H8 O    |
| Sum formula            | C43 H60 F6 Ir N4 O P         | C43 H60 F6 Ir N4 O P            |
| Mr                     | 986.14                       | 986.12                          |
| Dx, g cm <sup>-3</sup> | 1.530                        | 1.530                           |
| Z                      | 8                            | 8                               |
| Mu (mm <sup>-1</sup> ) | 3.221                        | 3.221                           |
| F000                   | 4000.0                       | 4000.0                          |
| F000'                  | 3991.14                      |                                 |
| h,k,lmax               | 16,30,31                     | 16,30,31                        |
| Nref                   | 8416                         | 8381                            |
| Tmin, Tmax             | 0.497, 0.773                 | 0.435, 0.445                    |
| Tmin'                  | 0.487                        |                                 |
| Correction method=     | CYLINDER                     |                                 |
| Data completeness=     | 0.996                        | Theta(max)= 26.000              |
| R(reflections)=        | 0.0459( 6086)                | wR2(reflections)= 0.1155( 8381) |
| s =                    | 1.046                        | Npar= 530                       |

The following ALERTS were generated. Each ALERT has the format

**test-name\_ALERT\_alert-type\_alert-level.**

Click on the hyperlinks for more details of the test.

### Alert level C

PLAT220\_ALERT\_2\_C Large Non-Solvent C Ueq(max)/Ueq(min) ... 3.3 Ratio  
 PLAT244\_ALERT\_4\_C Low 'Solvent' Ueq as Compared to Neighbors of P1  
 PLAT342\_ALERT\_3\_C Low Bond Precision on C-C Bonds ..... 0.0096 Ang

### Alert level G

PLAT002\_ALERT\_2\_G Number of Distance or Angle Restraints on AtSite 12  
 PLAT003\_ALERT\_2\_G Number of Uiso or Uij Restrained Atom Sites .... 57  
 PLAT005\_ALERT\_5\_G No \_iucr\_refine\_instructions\_details in CIF .... ?  
 PLAT042\_ALERT\_1\_G Calc. and Reported MoietyFormula Strings Differ ?  
 PLAT083\_ALERT\_2\_G SHELXL Second Parameter in WGHT Unusually Large. 17.54  
 PLAT195\_ALERT\_1\_G Missing \_cell\_measurement\_theta\_max datum .... ?  
 PLAT196\_ALERT\_1\_G Missing \_cell\_measurement\_theta\_min datum .... ?  
 PLAT301\_ALERT\_3\_G Note: Main Residue Disorder ..... 5 Perc.  
 PLAT779\_ALERT\_4\_G Suspect or Irrelevant (Bond) Angle in CIF .... # 142  
     C29A -C30 -C29B 1.555 1.555 1.555 27.80 Deg.  
 PLAT779\_ALERT\_4\_G Suspect or Irrelevant (Bond) Angle in CIF .... # 147  
     C31A -C30 -C31B 1.555 1.555 1.555 35.20 Deg.  
 PLAT860\_ALERT\_3\_G Note: Number of Least-Squares Restraints ..... 387

0 **ALERT level A** = Most likely a serious problem - resolve or explain  
 0 **ALERT level B** = A potentially serious problem, consider carefully  
 3 **ALERT level C** = Check. Ensure it is not caused by an omission or oversight  
 11 **ALERT level G** = General information/check it is not something unexpected

3 ALERT type 1 CIF construction/syntax error, inconsistent or missing data  
 4 ALERT type 2 Indicator that the structure model may be wrong or deficient  
 3 ALERT type 3 Indicator that the structure quality may be low  
 3 ALERT type 4 Improvement, methodology, query or suggestion  
 1 ALERT type 5 Informative message, check

## Datablock: complex4

Bond precision: C-C = 0.0097 A Wavelength=0.69110  
 Cell: a=12.6116(13) b=14.5499(15) c=16.8485(17)  
       alpha=90 beta=90 gamma=90  
 Temperature: 120 K

|                | Calculated        | Reported          |
|----------------|-------------------|-------------------|
| Volume         | 3091.7(5)         | 3091.7(5)         |
| Space group    | P 21 21 21        | P212121           |
| Hall group     | P 2ac 2ab         | P 2ac 2ab         |
| Moiety formula | C31 H40 Br2 N4 Ni | C31 H40 Br2 N4 Ni |
| Sum formula    | C31 H40 Br2 N4 Ni | C31 H40 Br2 N4 Ni |
| Mr             | 687.16            | 687.20            |

|                               |               |                                 |
|-------------------------------|---------------|---------------------------------|
| Dx, g cm <sup>-3</sup>        | 1.476         | 1.476                           |
| Z                             | 4             | 4                               |
| Mu (mm <sup>-1</sup> )        | 3.013         | 3.238                           |
| F000                          | 1408.0        | 1408.0                          |
| F000'                         | 1408.15       |                                 |
| h, k, lmax                    | 13, 15, 18    | 13, 15, 18                      |
| Nref                          | 2430 [ 4279 ] | 4280                            |
| Tmin, Tmax                    |               | 0.782, 0.968                    |
| Tmin'                         | 0.487         |                                 |
| Correction method= MULTI-SCAN |               |                                 |
| Data completeness= 1.76/1.00  |               | Theta(max)= 22.310              |
| R(reflections)= 0.0401( 3839) |               | wR2(reflections)= 0.1016( 4280) |
| s = 1.070                     | Npar= 351     |                                 |

The following ALERTS were generated. Each ALERT has the format

**test-name\_ALERT\_alert-type\_alert-level.**

Click on the hyperlinks for more details of the test.

## Alert level A

THETM01\_ALERT\_3\_A The value of sine(theta\_max)/wavelength is less than 0.550  
Calculated sin(theta\_max)/wavelength = 0.5493

## Alert level C

PLAT220\_ALERT\_2\_C Large Non-Solvent C Ueq(max)/Ueq(min) ... 3.3 Ratio  
PLAT341\_ALERT\_3\_C Low Bond Precision on C-C Bonds ..... 0.0097 Ang

## Alert level G

REFLT03\_ALERT\_4\_G Please check that the estimate of the number of Friedel pairs is correct. If it is not, please give the correct count in the \_publ\_section\_exptl\_refinement section of the submitted CIF.

From the CIF: \_diffrn\_reflns\_theta\_max 22.31

From the CIF: \_reflns\_number\_total 4280

Count of symmetry unique reflns 2430

Completeness (\_total/calc) 176.13%

TEST3: Check Friedels for noncentro structure

Estimate of Friedel pairs measured 1850

Fraction of Friedel pairs measured 0.761

Are heavy atom types Z>Si present yes

PLAT005\_ALERT\_5\_G No \_iucr\_refine\_instructions\_details in CIF .... ?

PLAT984\_ALERT\_1\_G The Br-f' = -0.290 Deviates from the B&C-Value -0.195

PLAT984\_ALERT\_1\_G The Ni-f' = 0.339 Deviates from the B&C-Value 0.343

PLAT985\_ALERT\_1\_G The Br-f'' = 2.460 Deviates from the B&C-Value 2.358

- 1 **ALERT level A** = Most likely a serious problem - resolve or explain  
0 **ALERT level B** = A potentially serious problem, consider carefully  
2 **ALERT level C** = Check. Ensure it is not caused by an omission or oversight  
5 **ALERT level G** = General information/check it is not something unexpected

- 3 ALERT type 1 CIF construction/syntax error, inconsistent or missing data  
1 ALERT type 2 Indicator that the structure model may be wrong or deficient  
2 ALERT type 3 Indicator that the structure quality may be low  
1 ALERT type 4 Improvement, methodology, query or suggestion  
1 ALERT type 5 Informative message, check

## Datablock: complex5

Bond precision: C-C = 0.0033 A Wavelength=0.71073  
Cell: a=10.4866(3) b=17.4528(4) c=19.3943(6)  
alpha=90 beta=104.482(1) gamma=90

Temperature: 120 K

|                        | Calculated                | Reported                  |
|------------------------|---------------------------|---------------------------|
| Volume                 | 3436.77(17)               | 3436.77(16)               |
| Space group            | P 21/n                    | P21/n                     |
| Hall group             | -P 2yn                    | -P 2yn                    |
| Moiety formula         | C33 H40 N4 Ni O2, C4 H8 O | C33 H40 N4 Ni O2, C4 H8 O |
| Sum formula            | C37 H48 N4 Ni O3          | C37 H48 N4 Ni O3          |
| Mr                     | 655.48                    | 655.50                    |
| Dx, g cm <sup>-3</sup> | 1.267                     | 1.267                     |
| Z                      | 4                         | 4                         |
| Mu (mm <sup>-1</sup> ) | 0.605                     | 0.605                     |
| F000                   | 1400.0                    | 1400.0                    |

```

F000'          1401.81
h,k,lmax      13,22,25          13,22,25
Nref          7913              7853
Tmin,Tmax     0.930,0.953      0.849,0.953
Tmin'         0.844
Correction method= MULTI-SCAN
Data completeness= 0.992          Theta(max)= 27.510
R(reflections)= 0.0482( 5640)      wR2(reflections)= 0.1070( 7853)
S = 1.037          Npar= 414

```

The following ALERTS were generated. Each ALERT has the format

**test-name\_ALERT\_alert-type\_alert-level.**

Click on the hyperlinks for more details of the test.

## Alert level G

```

PLAT005_ALERT_5_G No _iucr_refine_instructions_details in CIF .... ?
PLAT128_ALERT_4_G Alternate Setting of Space-group P21/c ..... P21/n
PLAT232_ALERT_2_G Hirshfeld Test Diff (M-X) Ni1 -- C32 .. 8.0 su
PLAT232_ALERT_2_G Hirshfeld Test Diff (M-X) Ni1 -- C33 .. 6.8 su

```

0 **ALERT level A** = Most likely a serious problem - resolve or explain  
0 **ALERT level B** = A potentially serious problem, consider carefully  
0 **ALERT level C** = Check. Ensure it is not caused by an omission or oversight  
4 **ALERT level G** = General information/check it is not something unexpected

0 ALERT type 1 CIF construction/syntax error, inconsistent or missing data  
2 ALERT type 2 Indicator that the structure model may be wrong or deficient  
0 ALERT type 3 Indicator that the structure quality may be low  
1 ALERT type 4 Improvement, methodology, query or suggestion  
1 ALERT type 5 Informative message, check

It is advisable to attempt to resolve as many as possible of the alerts in all categories. Often the minor alerts point to easily fixed oversights, errors and omissions in your CIF or refinement strategy, so attention to these fine details can be worthwhile. In order to resolve some of the more serious problems it may be necessary to carry out additional measurements or structure refinements. However, the purpose of your study may justify the reported deviations and the more serious of these should normally be commented upon in the discussion or experimental section of a paper or in the "special\_details" fields of the CIF. checkCIF was carefully designed to identify outliers and unusual parameters, but every test has its limitations and alerts that are not important in a particular case may appear. Conversely, the absence of alerts does not guarantee there are no aspects of the results needing attention. It is up to the individual to critically assess their own results and, if necessary, seek expert advice.

### Publication of your CIF in IUCr journals

A basic structural check has been run on your CIF. These basic checks will be run on all CIFs submitted for publication in IUCr journals (*Acta Crystallographica*, *Journal of Applied Crystallography*, *Journal of Synchrotron Radiation*); however, if you intend to submit to *Acta Crystallographica Section C* or *E*, you should make sure that [full publication checks](#) are run on the final version of your CIF prior to submission.

### Publication of your CIF in other journals

Please refer to the *Notes for Authors* of the relevant journal for any special instructions relating to CIF submission.

PLATON version of 25/09/2012; check.def file version of 20/09/2012

## Datablock LDiPPH2OTf2 - ellipsoid plot



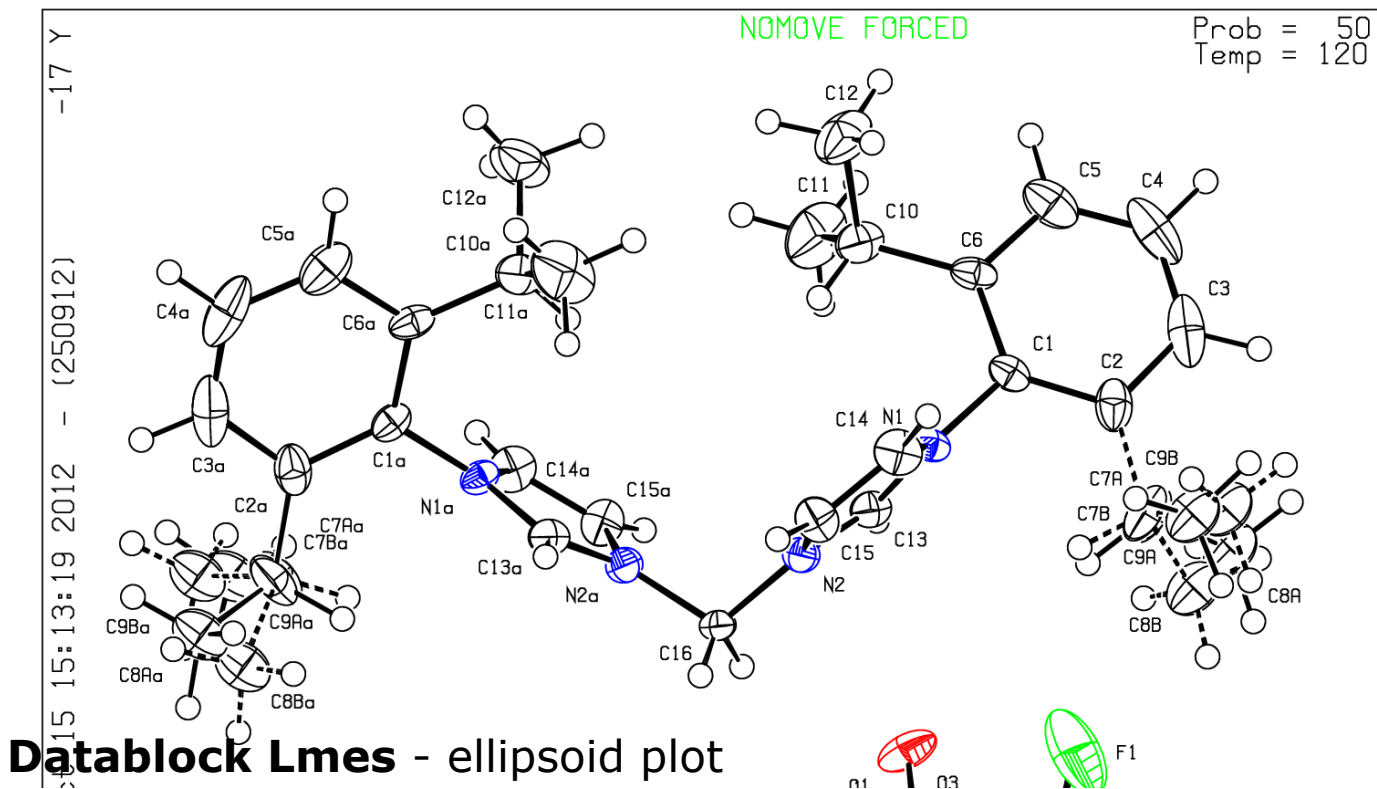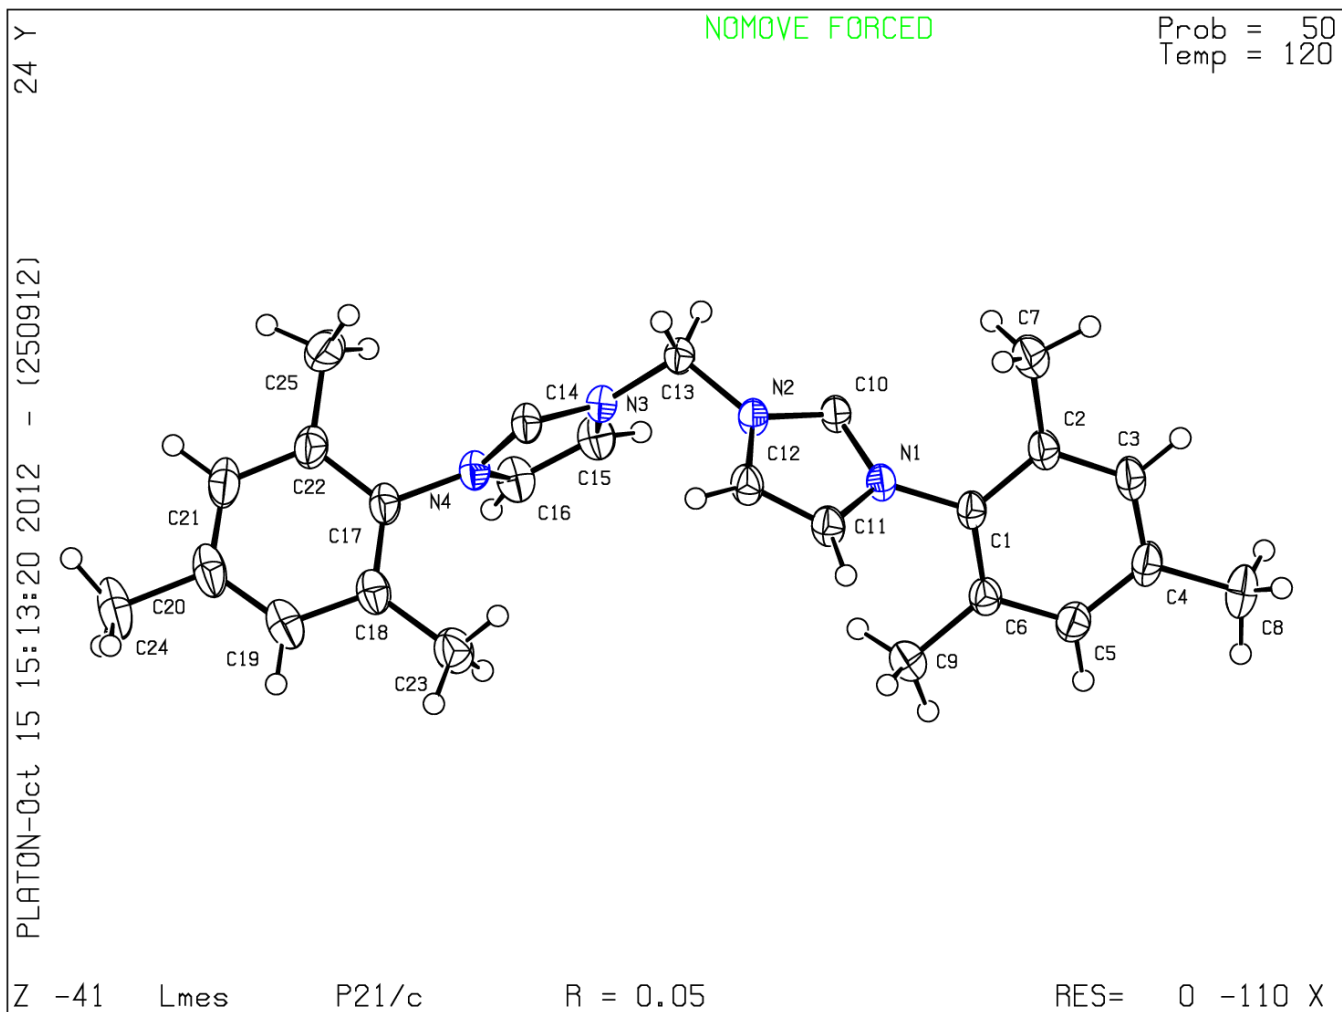

## Datablock LDiPPTe2 - ellipsoid plot

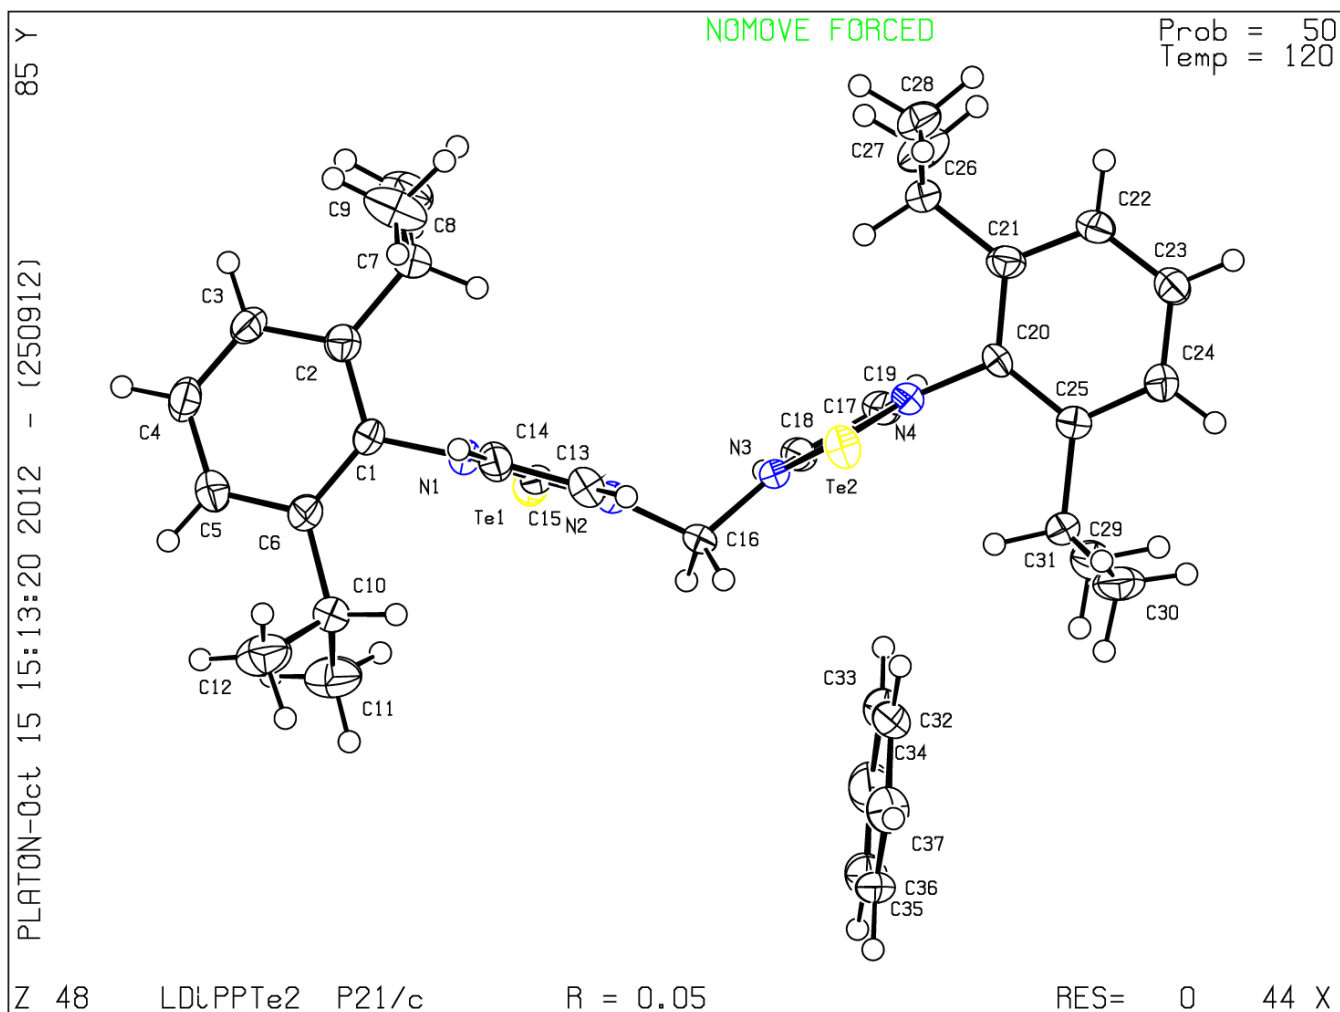

## Datablock complex1 - ellipsoid plot

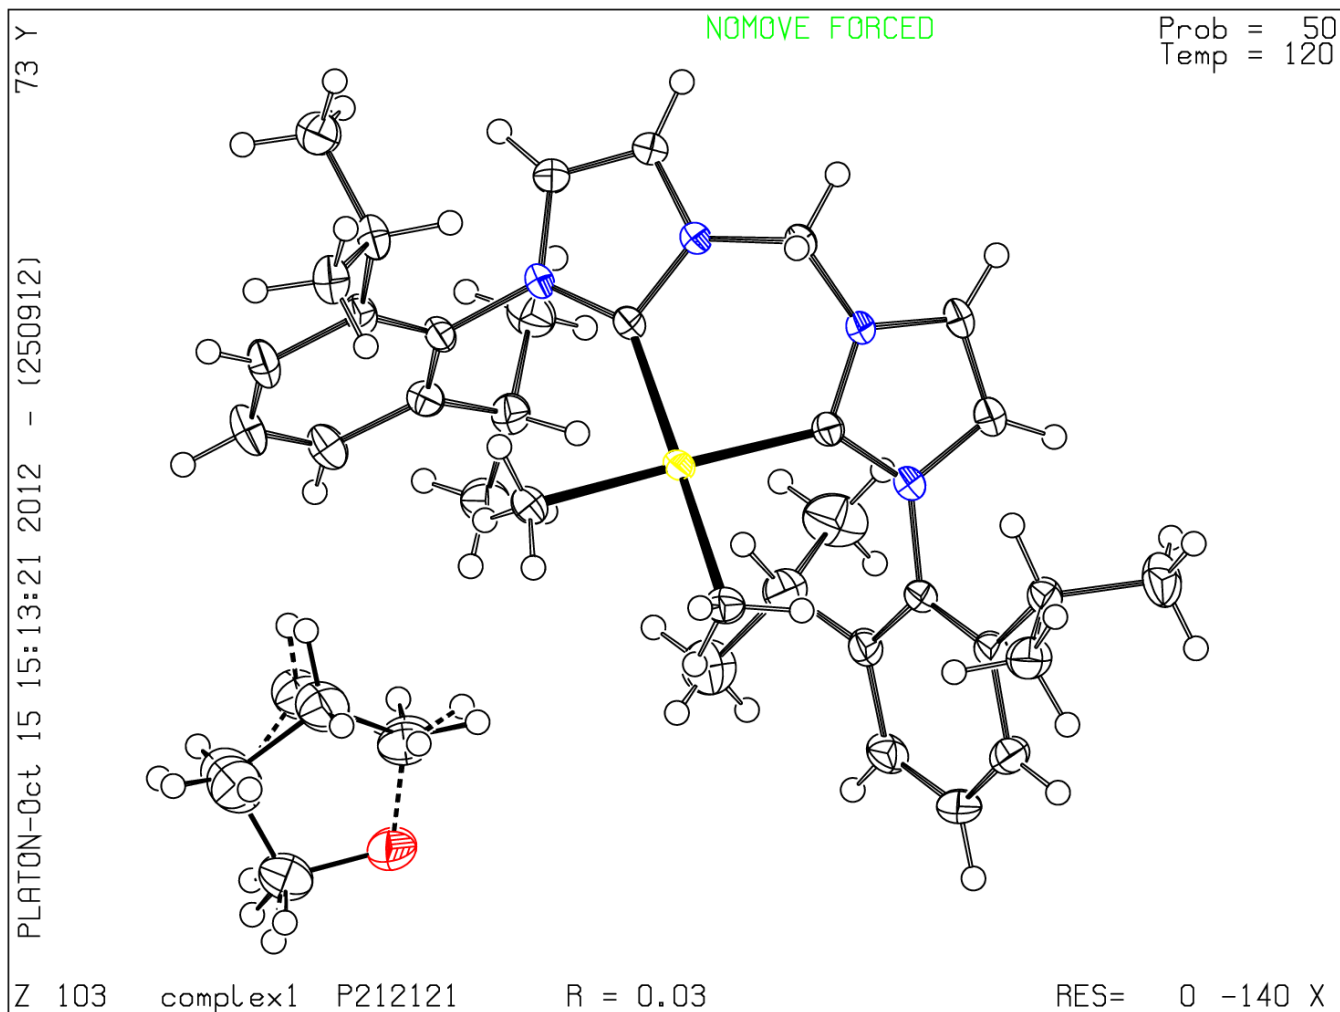

## Datablock complex2 - ellipsoid plot

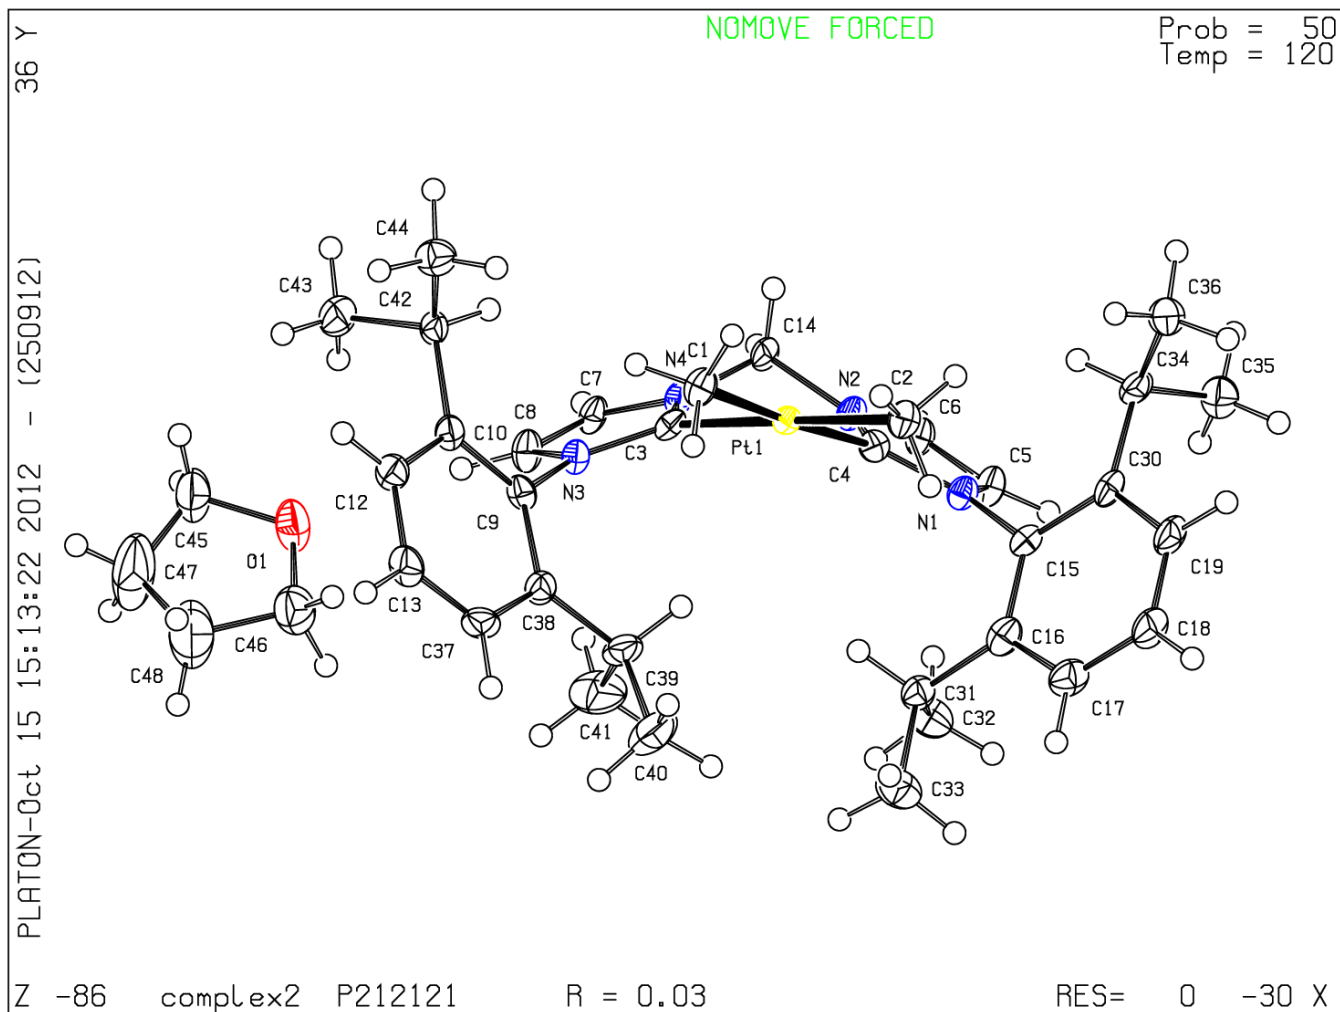

## Datablock complex3 - ellipsoid plot

NOMOVE FORCED

Prob = 50  
Temp = 153

57 Y

PLATON-Oct 15 15:13:23 2012 (250912)

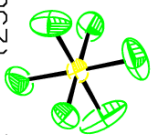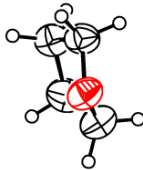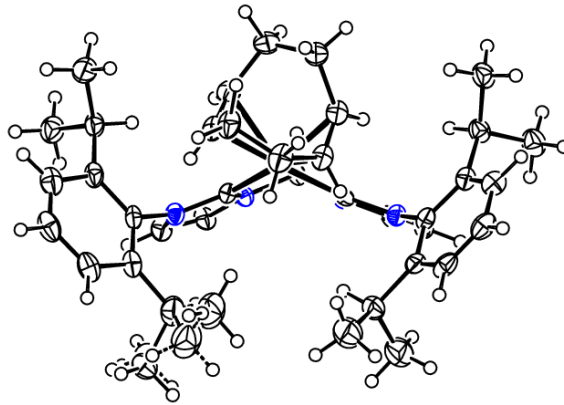

# Datablock complex4 - ellipsoid plot

RES= 0 68 X

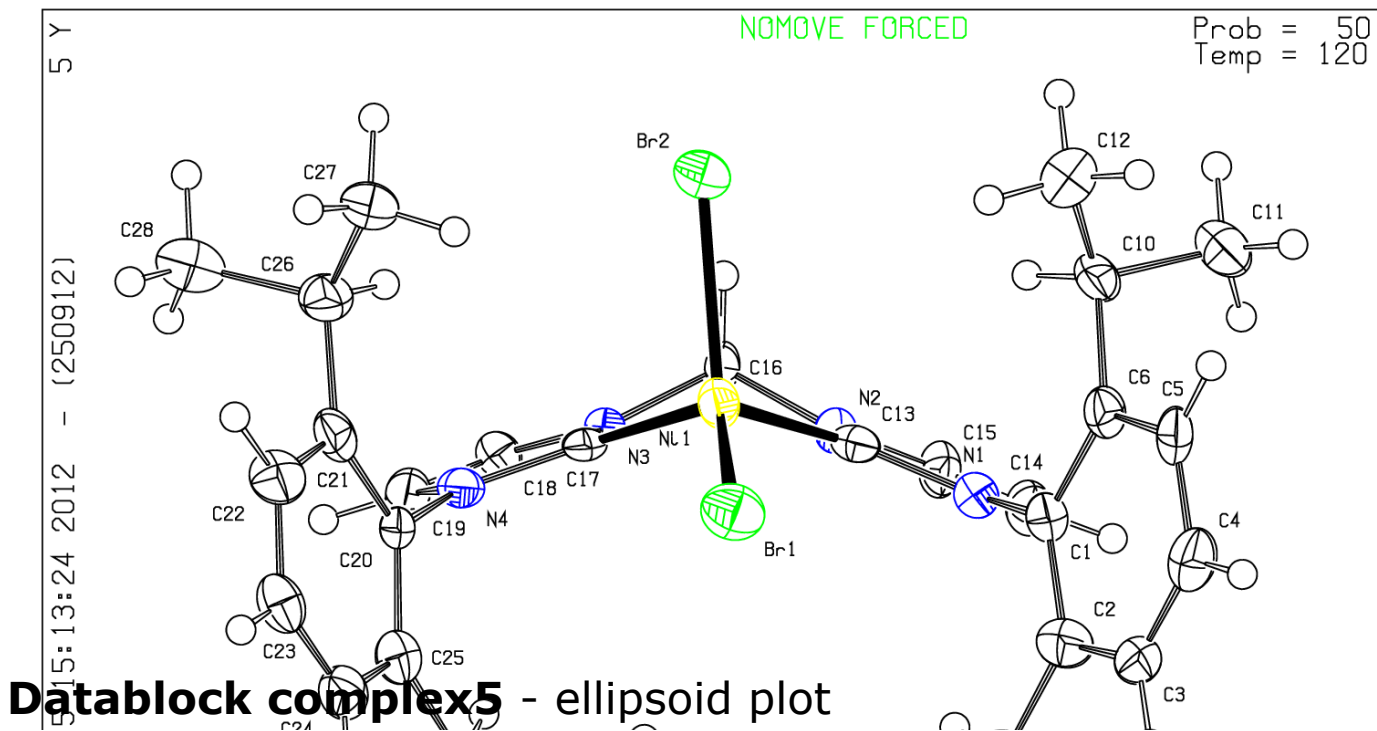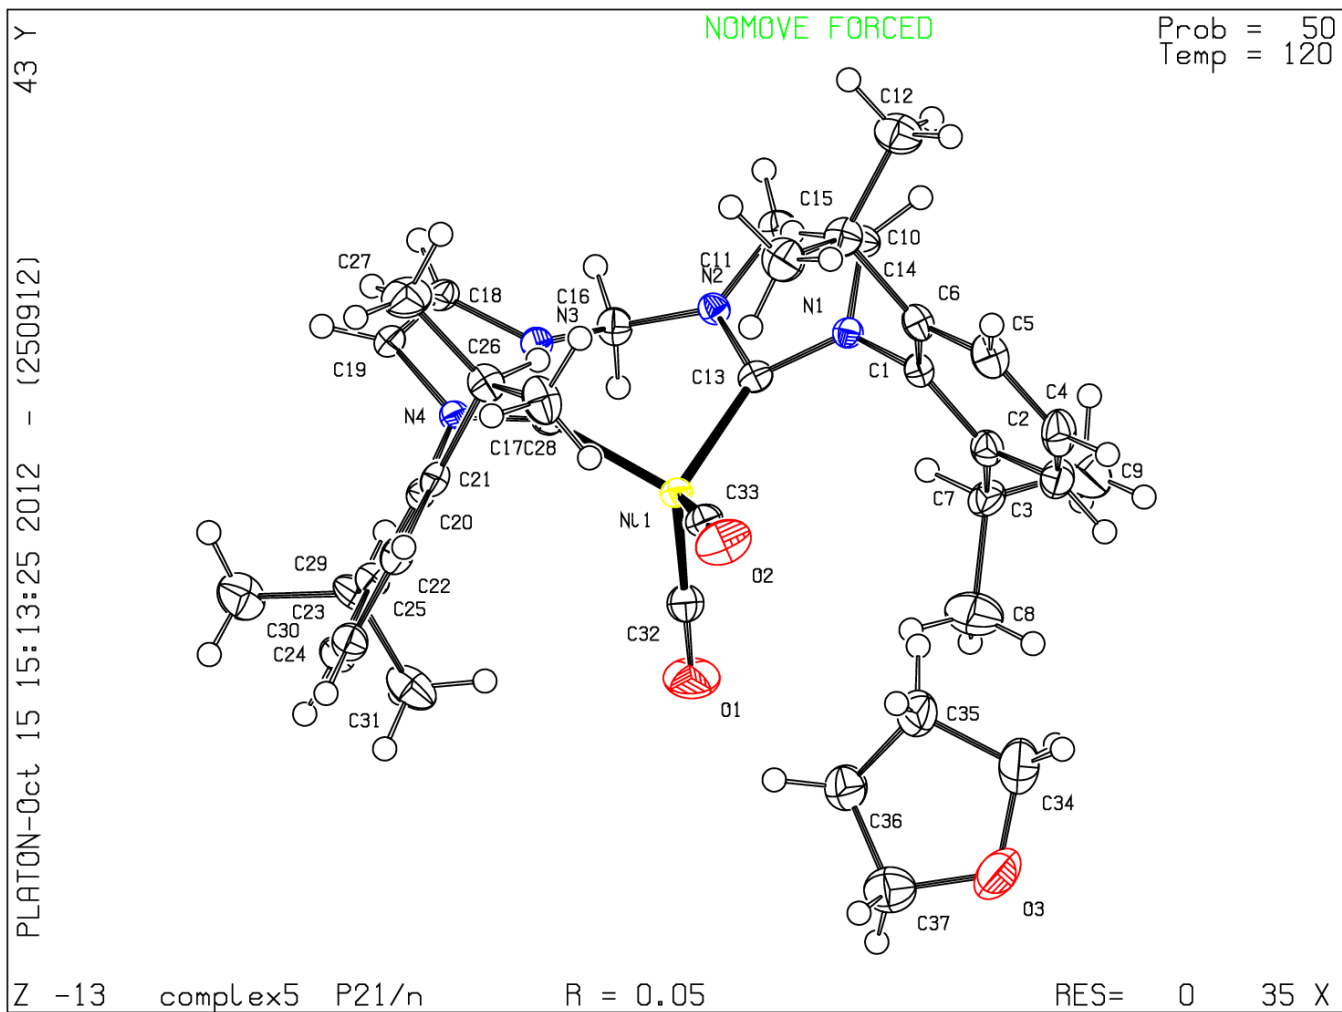

---

[Download CIF editor \(publCIF\) from the IUCr](#)  
[Download CIF editor \(enCIFer\) from the CCDC](#)  
[Test a new CIF entry](#)
